# Supplementary material
Source: PubMed Central journal article supplement (PMC6690208)

## Supplementary Online Content

Meredith E. Clement ME, Okeke NL, Hicks CB. Treatment of syphilis: a systematic review. *JAMA*. doi: 10.1001/jama.2014.13259

### **eFigure.** Literature Review

This supplementary material has been provided by the authors to give readers additional information about their work.

**eFigure.** Literature Review

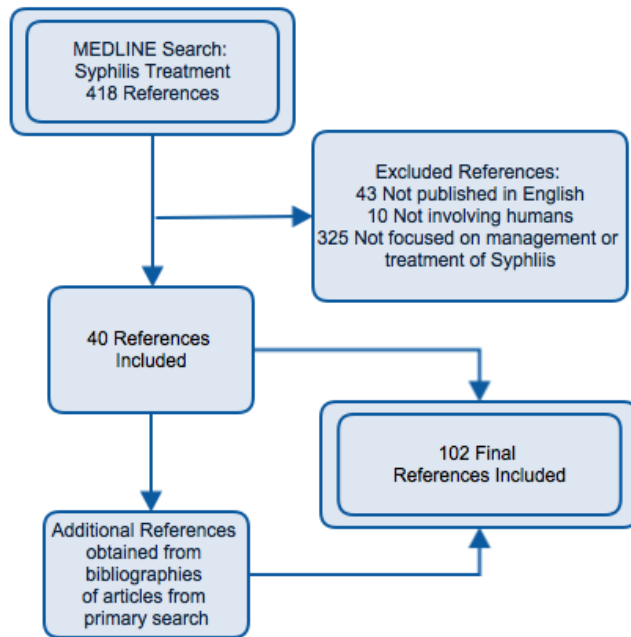

Supplement: NIHMS1030656-supplement-Supplemental_Content.pdf [file NIHMS1030656-supplement-Supplemental_Content.pdf]
